# Supplementary material for: Critical Review on Sustainability in Denim: A Step toward Sustainable Production and Consumption of Denim
Source: PubMed Central journal article supplement (PMC9909807; doi:10.1021/acsomega.2c06374), 2023-01-13
Supplement: ao2c06374_si_001.pdf [file ao2c06374_si_001.pdf]

Supporting Information (SI) for

**Critical review on Sustainability in Denim: A step towards  
sustainable production and consumption of denim**

*Aravin Prince Periyasamy<sup>1\*</sup>, Saravanan Periyasami<sup>2</sup>*

<sup>1</sup>Department of Bioproducts and Biosystems, School of Chemical Engineering, Aalto  
University, Espoo, 02150, Finland.

<sup>2</sup>R&D manager laundry operations, Thuan phuong co.,ltd (garments -embroideries), Vietnam.

\*Corresponding author (APP): [aravinprince.periyasamy@aalto.fi](mailto:aravinprince.periyasamy@aalto.fi) &  
([aravinprincep@gmail.com](mailto:aravinprincep@gmail.com))

Number of Pages: 2

Number of figures: 3

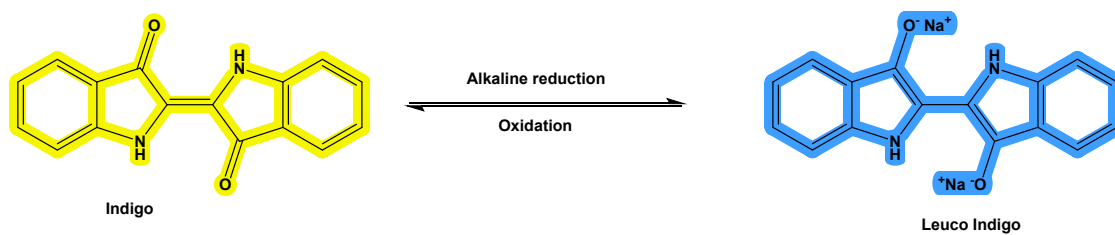

Figure S1. Oxidation-reduction reaction of indigo.

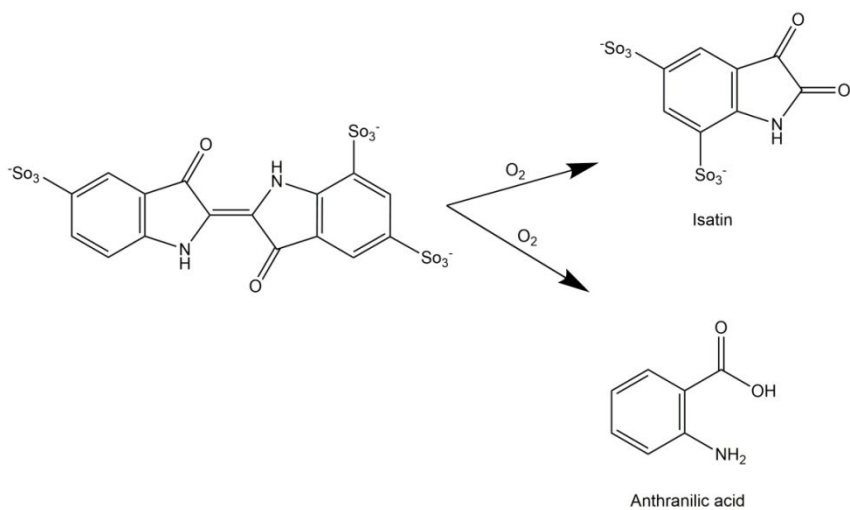

Figure S2. Schematic mechanism of denim bleaching with ozone.

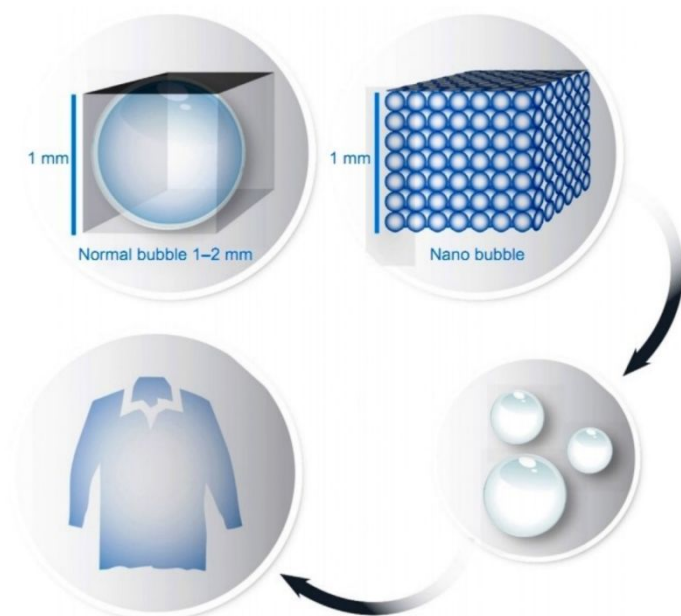

Figure S3. e-flow process for denim.
